# Supplementary material for: Conversion of syngas into light olefins over bifunctional ZnCeZrO/SAPO-34 catalysts: regulation of the surface oxygen vacancy concentration and its relation to the catalytic performance
Source: Royal Society of Chemistry journal article supplement (doi:10.1039/d0cy01759k), 2020-11-02
Supplement: d0cy01759k1.pdf [file d0cy01759k1.pdf]

Electronic supplementary information (ESI)

**Conversion of syngas into light olefins over the bifunctional ZnCeZrO/SAPO-34 catalysts: Regulation of the surface oxygen vacancy concentration and its relation to the catalytic performance**

Yaoya Luo,<sup>a,b</sup> Sen Wang,<sup>\*,a</sup> Shujia Guo,<sup>a,b</sup> Kai Yuan,<sup>a,b</sup> Hao Wang,<sup>a</sup> Mei Dong,<sup>a</sup> Zhangfeng Qin,<sup>\*,a</sup> Weibin Fan,<sup>a</sup> Jianguo Wang<sup>\*,b</sup>

<sup>a</sup> *State Key Laboratory of Coal Conversion, Institute of Coal Chemistry, Chinese Academy of Sciences, P.O. Box 165, Taiyuan, Shanxi 030001, PR China*

<sup>b</sup> *University of the Chinese Academy of Sciences, Beijing 100049, PR China*

*\* Corresponding authors. Tel.: +86-351-4046092; Fax: +86-351-4041153. E-mail address: qzhf@sxicc.ac.cn (Z. Qin); wangsen@sxicc.ac.cn (S. Wang); iccjgw@sxicc.ac.cn (J. Wang)*

As the Electronic supplementary information (ESI) of the manuscript “*Conversion of syngas into light olefins over the bifunctional ZnCeZrO/SAPO-34 catalysts: Regulation of the surface oxygen vacancy concentration and its relation to the catalytic performance*”, following materials are provided:

More characterization results for the  $\text{Zn}_{0.5}\text{CeZrO}_x$  composite oxides prepared with different complexing agents and calcined at different temperatures; optimization of the reaction conditions for the conversion of syngas to olefins over the  $\text{Zn}_{0.5}\text{CeZrO}_x$ -glucose-500/SAPO-34 bifunctional catalyst.

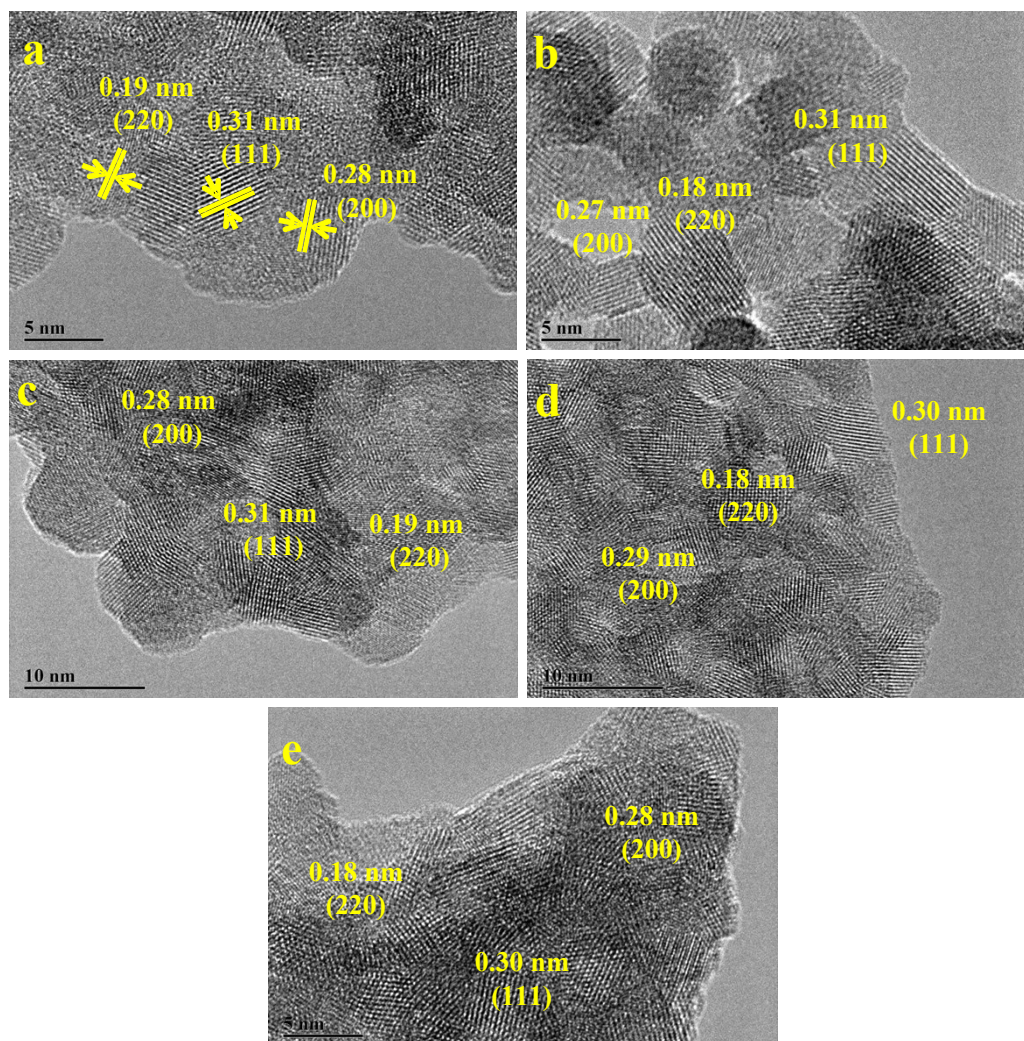

**Fig. S1.** HR-TEM images of the  $\text{Zn}_{0.5}\text{CeZrO}_x$  composite oxides prepared with different complexing agents: (a)  $\text{Zn}_{0.5}\text{CeZrO}_x$ -glucose, (b)  $\text{Zn}_{0.5}\text{CeZrO}_x$ -citric acid, (c)  $\text{Zn}_{0.5}\text{CeZrO}_x$ -tartaric acid, (d)  $\text{Zn}_{0.5}\text{CeZrO}_x$ -adipic acid, and (e)  $\text{Zn}_{0.5}\text{CeZrO}_x$ -L-alanine.

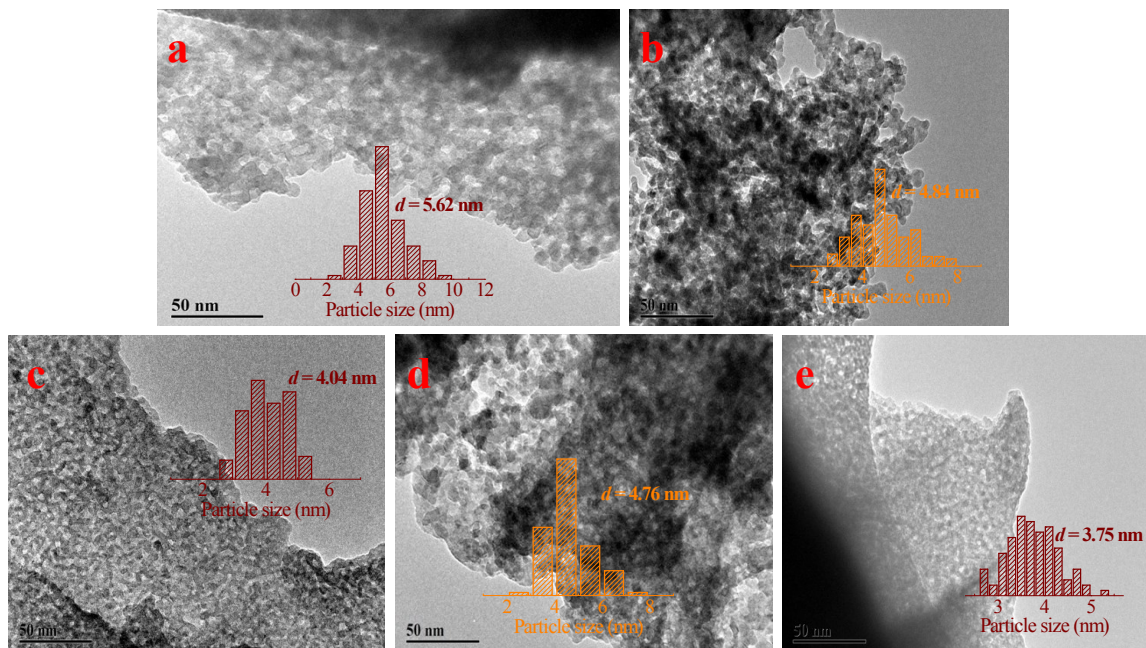

**Fig. S2.** TEM images and size distributions (estimated by counting more than 100 particles) of the  $\text{Zn}_{0.5}\text{CeZrO}_x$  composite oxides prepared with different complexing agents: (a)  $\text{Zn}_{0.5}\text{CeZrO}_x$ -glucose, (b)  $\text{Zn}_{0.5}\text{CeZrO}_x$ -citric acid, (c)  $\text{Zn}_{0.5}\text{CeZrO}_x$ -tartaric acid, (d)  $\text{Zn}_{0.5}\text{CeZrO}_x$ -adipic acid, and (e)  $\text{Zn}_{0.5}\text{CeZrO}_x$ -L-alanine.

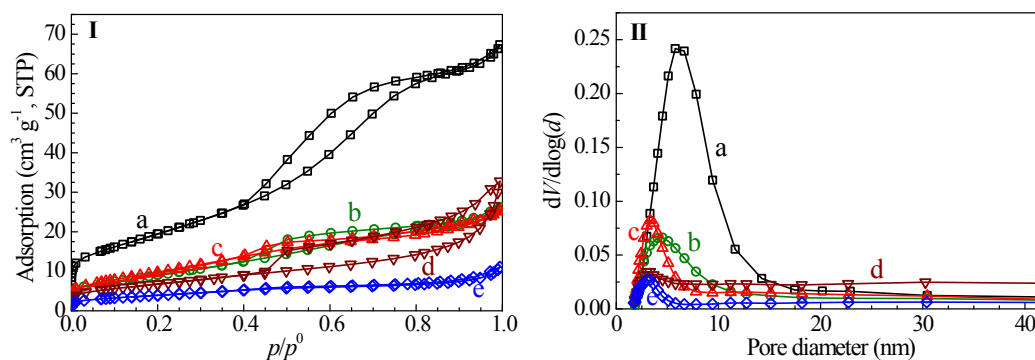

**Fig. S3.**  $\text{N}_2$  adsorption-desorption isotherms (I) and corresponding pore size distribution curves (II) of the  $\text{Zn}_{0.5}\text{CeZrO}_x$  composite oxides prepared with different complexing agents: (a)  $\text{Zn}_{0.5}\text{CeZrO}_x$ -glucose, (b)  $\text{Zn}_{0.5}\text{CeZrO}_x$ -citric acid, (c)  $\text{Zn}_{0.5}\text{CeZrO}_x$ -tartaric acid, (d)  $\text{Zn}_{0.5}\text{CeZrO}_x$ -adipic acid, and (e)  $\text{Zn}_{0.5}\text{CeZrO}_x$ -L-alanine.

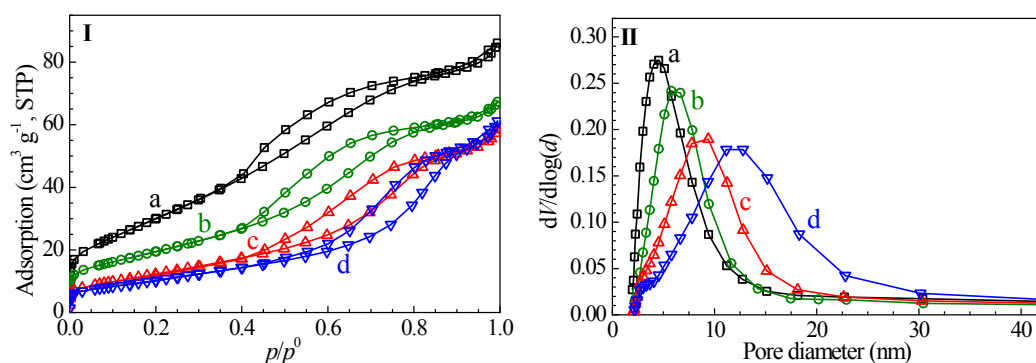

**Fig. S4.** N<sub>2</sub> adsorption-desorption isotherms **(I)** and corresponding pore size distribution curves **(II)** of the Zn<sub>0.5</sub>CeZrO<sub>x</sub>-glucose composite oxides (prepared with glucose as the complexing agent) calcined at different temperatures: (a) 400 °C; (b) 500 °C; (c) 600 °C; and (d) 700 °C.

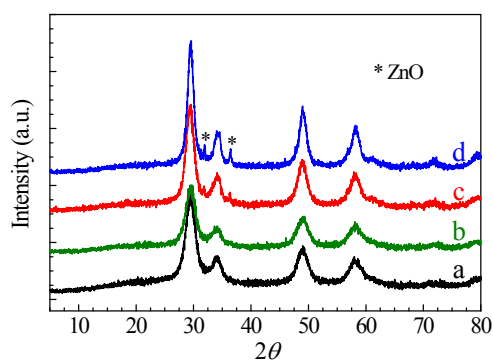

**Fig. S5.** XRD patterns of the Zn<sub>0.5</sub>CeZrO<sub>x</sub>-glucose composite oxides (prepared with glucose as the complexing agent) calcined at different temperatures: (a) 400 °C; (b) 500 °C; (c) 600 °C; and (d) 700 °C.

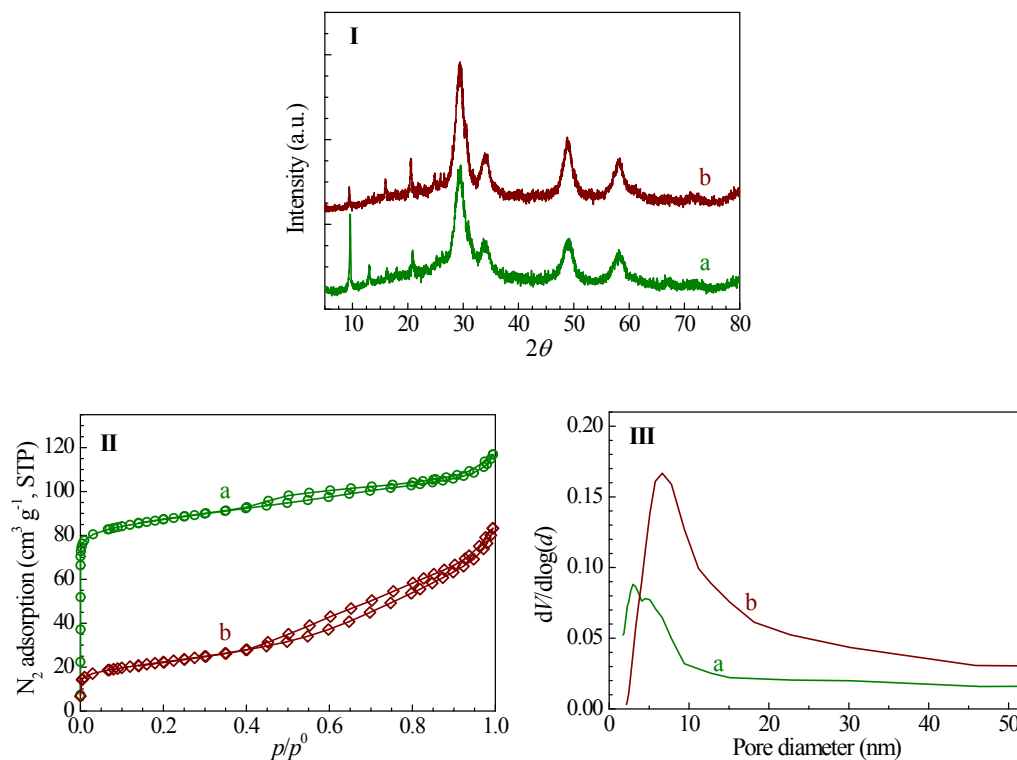

**Fig. S6.** XRD patterns (I),  $N_2$  adsorption-desorption isotherms (II) and corresponding pore size distribution curves (III) of the  $Zn_{0.5}CeZrO_x$ -glucose/SAPO-34 composite catalyst before (a, fresh) and after enduring the reaction of syngas to light olefins (b, spent).

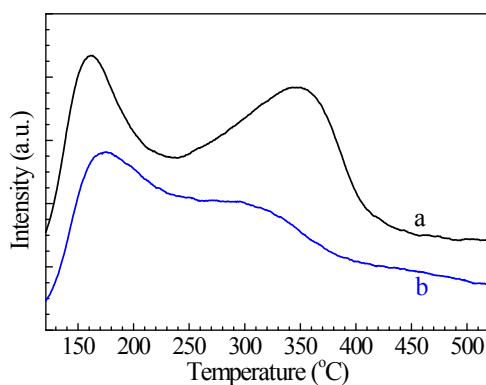

**Fig. S7.**  $NH_3$ -TPD profiles of the SAPO-34 molecular sieve (a) and the  $Zn_{0.5}CeZrO_x$ -glucose/SAPO-34 composite catalyst (b).

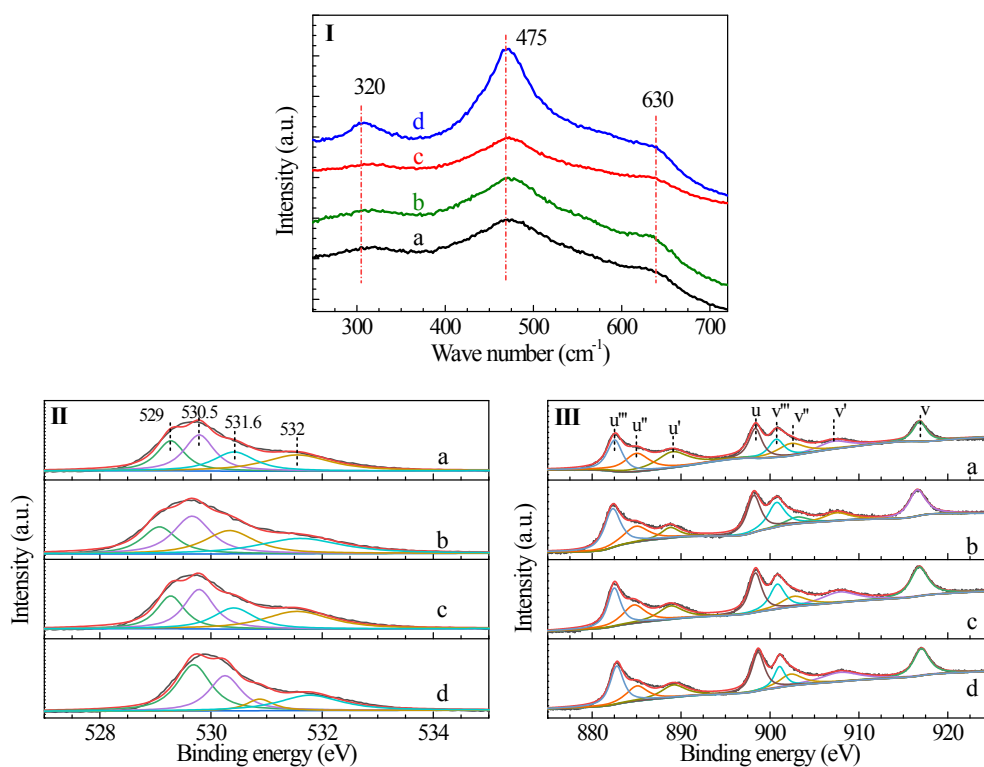

**Fig. S8.** Raman spectra (**I**), O(1s) XPS spectra (**II**), and Ce(3d) XPS spectra (**III**) of the  $\text{Zn}_{0.5}\text{CeZrO}_x$ -glucose composite oxides (prepared with glucose as the complexing agent) calcined at different temperatures: (a) 400 °C; (b) 500 °C; (c) 600 °C; and (d) 700 °C.

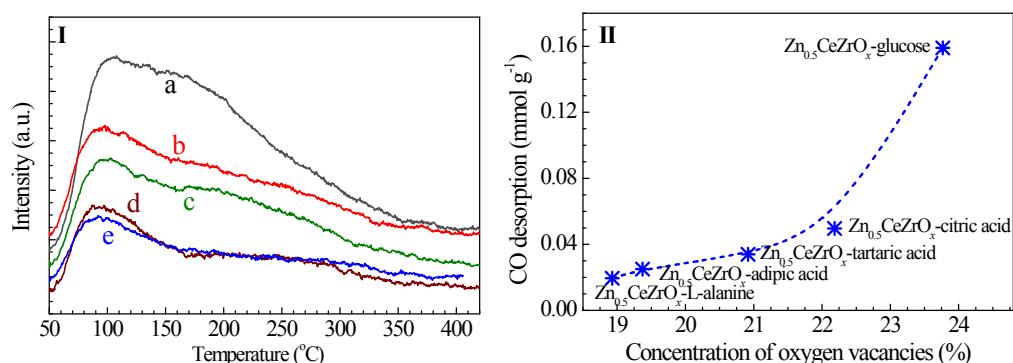

**Fig. S9. (I)** CO-TPD profiles of the  $\text{Zn}_{0.5}\text{CeZrO}_x$  composite oxides prepared with different complexing agents: (a)  $\text{Zn}_{0.5}\text{CeZrO}_x$ -glucose, (b)  $\text{Zn}_{0.5}\text{CeZrO}_x$ -citric acid, (c)  $\text{Zn}_{0.5}\text{CeZrO}_x$ -tartaric acid, (d)  $\text{Zn}_{0.5}\text{CeZrO}_x$ -adipic acid, and (e)  $\text{Zn}_{0.5}\text{CeZrO}_x$ -L-alanine. **(II)** Variation of the CO adsorption quantity obtained from CO-TPD with the concentration of surface oxygen vacancies of the  $\text{Zn}_{0.5}\text{CeZrO}_x$  composite oxides measured by O 1s XPS. The desorption amount of CO was calculated according to the peak area between 150 and 350 °C in the CO-TPD profiles; as the desorption of CO on the  $\text{ZnCeZrO}$  composite oxide appears in general at 50–320 °C and levels off with the temperature above 350 °C, the recording of the CO-TPD profiles of several samples ends at 450–500 °C.

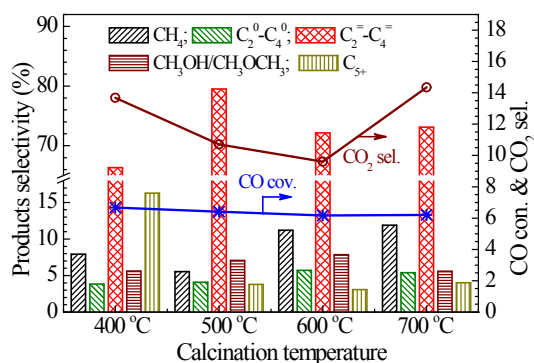

**Fig. S10.** CO conversion and products selectivity for the conversion of syngas over the  $\text{Zn}_{0.5}\text{CeZrO}_x$ -glucose/SAPO-34 bifunctional catalysts calcined at different temperatures (400, 500, 600 and 700 °C). Reaction conditions:  $\text{H}_2/\text{CO} = 2/1$ , 300 °C, 1.0 MPa, GHSV = 5400 mL/g·h, 30 h,  $\text{Zn}_{0.5}\text{CeZrO}_x/\text{SAPO-34} = 1$  (by mass); reported at a TOS of 30 h.

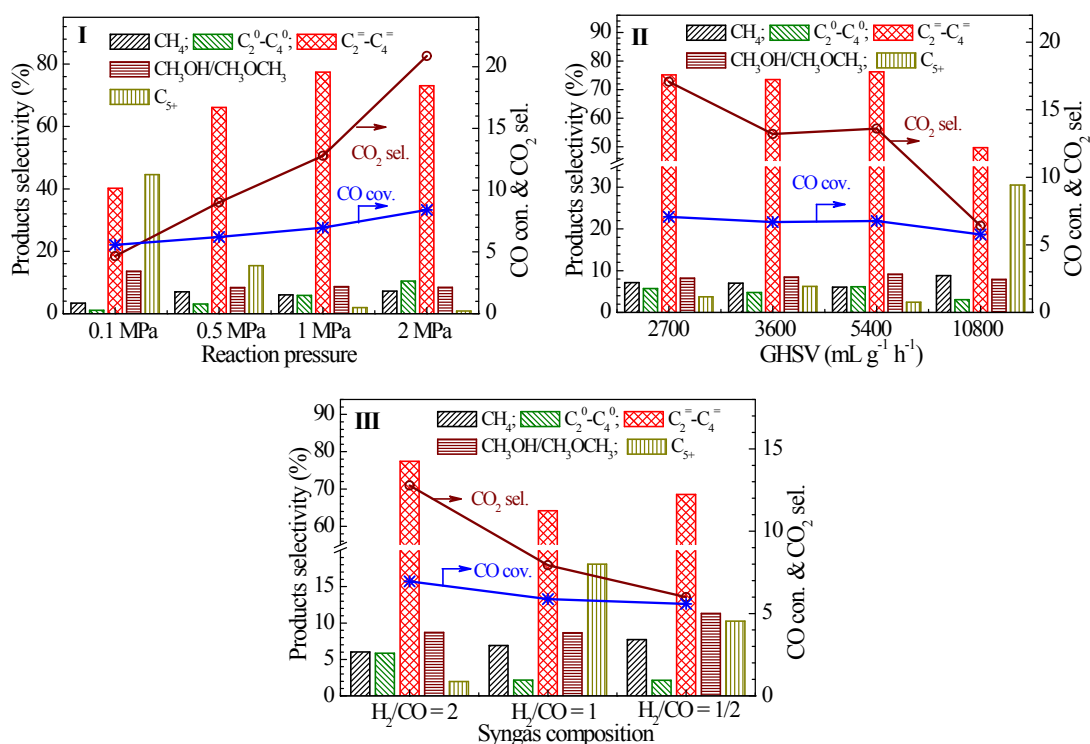

**Fig. S11.** Influences of the reaction pressure (I), gas hourly space velocity (II), and syngas  $\text{H}_2/\text{CO}$  ratio (III) on the CO conversion and products distribution for the conversion of syngas over the  $\text{Zn}_{0.5}\text{CeZrO}_x$ -glucose-500/SAPO-34 bifunctional catalyst. Except that specified at the graph abscissa, the reaction was carried out under a  $\text{H}_2/\text{CO}$  molar ratio of 2, 300 °C, 1.0 MPa, GHSV = 5400  $\text{mL g}^{-1} \text{h}^{-1}$ ,  $\text{Zn}_{0.5}\text{CeZrO}_x/\text{SAPO-34}$  = 1 (by mass); the data were reported at a TOS of 15 h.
